# Supplementary material for: Comparison of the predictive value of two international guidelines for safe discharge of patients with mild traumatic brain injuries and associated intracranial pathology
Source: Springer Nature journal article supplement (doi:10.1007/s00068-021-01842-6), 2021-12-03
Supplement: MOESM1 [file 19930264]

## **Supplementary material 2: Coding Template**

### **Title:**

Performance of the Brain Injury Guidelines and the Mild Traumatic Brain Injury Risk Score in a Scandinavian population – A Retrospective Chart Review

### **Journal:**

European Journal of Trauma and Emergency Surgery

### **Authors:**

Sebastian Vestlund (**Corresponding author**)  
Faculty of Medicine – Department of Clinical Sciences,  
Lund University, Sweden  
[Sebastian.Vestlund@med.lu.se](mailto:Sebastian.Vestlund@med.lu.se)  
+46708244127

Sebastian Tryggmo  
Faculty of Medicine,  
Lund University, Sweden

Tomas Vedin  
Faculty of Medicine – Department of Clinical Sciences  
Lund University, Sweden

Per-Anders Larsson  
Faculty of Medicine – Department of Clinical Sciences  
Lund University, Sweden

Marcus Edelhamre  
Faculty of Medicine – Department of Clinical Sciences  
Lund University, Sweden

**1. SEX - Gender**

---

0 = Female  
1 = Male

**2. AGE - Age**

---

Fulfilled years

**3. ADM\_DATE - Admission date**

---

YYYY-MM-DD.

**4. ADM\_TIME - Admission time**

---

HH: MM

**5. DISC\_DATE - Discharge date**

---

YYYY-MM-DD

**6. DISC\_TIME - Discharge time**

---

HH: MM

**7. n\_DAYS - Number of days in hospital**

---

Number of full days.

**8. n\_HOURS - In less than a day, number of hours?**

---

HH: MM  
88 = Not relevant

**9. EXCL - Excluded?**

---

0 = No  
1 = Yes

**10. EXCL\_WHY - If excluded, why?**

---

0 = Not excluded  
1 = Incorrectly registered as intracranial injury, alternatively non-traumatic injury  
2 = Double  
3 = Re-admission for already included injury  
4 = Transferred from another hospital  
5 = Journal with extended confidentiality  
6 = Transferred to another region before discharge  
7 = Died after last registered care opportunity  
8 = Initial CT missing  
9 = Patient from another region / from abroad  
10 = Penetrating injury

**11. COAGPATH - Known congenital coagulation disorder?**

---

0 = No  
1 = Yes

If nothing is stated in the record for the current care session, this is interpreted as 0.

**12.TIME\_TRAUMA - Time from trauma to emergency room?**

---

- 1 = 0-6 h
- 2 = 6-12 h
- 3 = 12-24
- 4 = < 24 h
- 5 = > 24 h
- 6 = > a week
- 7 = > a month
- 99 = Data missing

If the time cannot be assessed with certainty, state 99. If it appears that the injury occurred within a day but can not be determined closer than that, alternative 4.

**13.MECHANISM - Trauma mechanism**

---

- 1 = Fall in the same level(from sitting or standing)
- 2 = Fall from height
- 3 = Assault
- 4 = Traffic accident
- 5 = Sports injury
- 6 = Other
- 7 = Unknown
- 99 = Not stated in journal

**14.AMNESIA - Amnesia after the injury?**

---

- 0 = No
- 1 = Yes
- 2 = Not mentioned in the journal

**15.AMNESIA\_TYPE - If amnesia, what type?**

---

- 1 = Antegrade
- 2 = Retrograde
- 3 = Patient can not characterize amnesia as retrograde or antegrade
- 4 = Combined antegrade and retrograde
- 88 = Not relevant
- 99 = Data missing

**16.AMNESIA\_DURATION - Amnesia duration?**

---

- 1 = Under 30 min
- 2 = Over 30 min
- 3 = Unknown duration
- 4 = Not stated in journal
- 88 = Not relevant

**17.LOC - Loss of consciousness?**

---

- 0 = No
- 1 = Yes
- 2 = Not mentioned in journal
- 3 = Uncertain

99 = Data missing

---

**18.LOC\_DURATION - If loss of consciousness, duration?**

---

- 1 = "Momentarily"
- 2 = <1 min
- 3 => 1 min <5 min
- 4 => 5 min
- 5 = Patient does not know
- 6 = Unconscious on arrival
- 88 = Not relevant
- 99 = Data missing / no assessment of duration stated

---

**19.INTOX - Intoxicated ?**

---

- 0 = Not intoxicated
- 1 = Alcohol
- 2 = Cannabis
- 3 = Central stimulants (Cocaine, Amphetamine, Methamphetamine, Methylphenidate, LSD, Ecstasy)
- 4 = Opiates (Heroin, Morphine, Oxycodone, Codeine, Tramadol)
- 5 = Benzodiazepines (Xanor, Iktorivil, Storivol, Storivol Oxascand)
- 6 = Unknown substance
- 7 = Pat can not report
- 8 = Other
- 9 = Mixed intoxication
- 99 = No data

History of intake of any substance, laboratory findings indicating intake, alcohol odor or other abnormalities that are primarily interpreted as intoxication should be stated as intoxicated. "Unknown substance" is used if the type of substance is not specified. "Not intoxicated" is stated if the journal does not comment on the subject.

---

**20.ALC\_ABUSE - Suspicion of chronic alcoholism based on the note?**

---

- 0 = No
- 1 = Yes

---

**21.SEIZURE\_PREHOSP - Seizure before arriving at hospital?**

---

- 0 = No
- 1 = Yes
- 2 = Not mentioned
- 3 = Possible

---

**22.n\_SEIZURE\_PREHOSP - If seizures, number of episodes?**

---

- Figure.
- 88 = Not relevant
- 99 = Cannot be determined with certainty

---

**23.SEIZURE\_ED - Seizures in the emergency department?**

---

- 0 = No
- 1 = Yes

2 = Not mentioned journal

**24.n\_SEIZURE\_ED - About seizures in hospital, number of episodes?**

---

Figure.

88 = Not applicable

**25.VOMIT\_PREHOSP - Vomiting before arrival at the hospital?**

---

0 = No

1 = Yes

2 = Not mentioned

**26.n\_VOMIT\_PREHOSP - About vomiting, number of episodes?**

---

Figure.

88 = Not relevant

99 = Can not be determined with certainty

**27.VOMIT\_ED - Vomiting in the emergency department?**

---

0 = No

1 = Yes

2 = Not mentioned

**28.n\_VOMIT\_ED - About vomiting in hospital, number of episodes?**

---

Figure.

0 = Number not specified.

88 = Not relevant

99 = Cannot be determined with certainty

**29.HEADACHE - Headache after injury?**

---

0 = No

1 = Yes

2 = Not mentioned

**30.DOC\_RLS - Formal documentation of RLS in the emergency department note?**

---

0 = No

1 = Yes

**31.DOC\_RLS\_LEVEL - If yes, RLS level at the first listing?**

---

1-8.

88 = Not relevant

**32.INT\_RLS - If no, possible to determine RLS from the note?**

---

0 = No

1 = Yes

**33.INT\_RLS\_LEVEL - If yes, RLS level?**

---

1-8.

88 = Not relevant

**34.DOC\_GCS - Formal documentation of GCS in the emergency department?**

---

- 0 = No
- 1 = Yes

**35.DOC\_GCS\_LEVEL - If yes, GCS level at the first listing?**

---

- 3–15.
- 88 = Not relevant

**36.INT\_GCS - If no, possible to determine GCS 15 from the note?**

---

- 0 = No
- 1 = Yes

**37.INT\_GCS\_LEVEL - If yes, GCS level?**

---

- 3–15.
- 88 = Not relevant

**38.NORM\_NEURO\_EX - Normal neurological examination in the emergency department?**

---

- 0 = No
- 1 = Yes
- 2 = Cannot be valued from the note due to. insufficient documentation.
- 3 = No neurological examination documented.

**39.EQ\_PUPILS - Pupils of the same size at the first examination?**

---

- 0 = No
- 1 = Yes
- 2 = Not stated in the medical record
- 3 = Cannot be evaluated based on the note (eg one-eyed, swollen)

**40.REACT\_PUPILS - Both pupils are light-reactive at the first examination?**

---

- 0 = No
- 1 = Yes
- 2 = Not stated in journal
- 3 = Cannot be evaluated

**41.SIGNS\_SKULLFX - Signs of a skull fracture?**

---

- 0 = No signs of skull fracture
- 1 = Palpable level difference on examination
- 2 = Palpable fluctuation in the skull
- 3 = Boggy hematoma
- 4 = Retroauricular hematomas (Battle sign)
- 5 = Hematotympanon
- 6 = Clear secretion from ear or nose
- 7 = Multiple signs
- 8 = Not commented in journal

If no note mentions the presence or absence of external injuries to the head, select 8.

**42.CARDVASC\_DIS - Cardiovascular disease?**

---

- 0 = No
- 1 = Yes

- Past myocardial infarction
- Heart failure
- Previous TIA / Stroke
- Peripheral vascular disease
- Completed reperfusion surgery (CABG, PCI, PTA)
- Heart transplant

---

**43. DIABETES\_MELL - Diabetes mellitus?**

---

0 = No  
1 = Yes

---

**44. PULM\_DIS - Lung disease?**

---

0 = No  
1 = Yes

- COPD
- Pulmonary fibrosis
- Severe asthma

---

**45. ESRD - Kidney failure with dialysis / Chronic kidney failure with eGFR <30?**

---

0 = No  
1 = Yes

---

**46. LIVER\_DIS - Liver disease?**

---

0 = No  
1 = Yes

- Liver cirrhosis
- Other liver diseases with affected liver enzymes

---

**47. NEURO\_DIS - Neurological disease?**

---

0 = No  
1 = Yes

- Multiple sclerosis
- Amyotrophic lateral sclerosis
- Epilepsy
- Guillan-Barré syndrome
- Myasthenia gravis
- Parkinson's

---

**48. DEMENTIA - Dementia?**

---

0 = No  
1 = Yes

Regardless of degree or cause.

#### 49. PSYCH\_DIS - Psychiatric illness?

---

0 = No  
1 = Yes

- Severe depression
- Bipolar disorder
- Chronic psychotic disorders
- Dementia with delusions that have required inpatient psychiatric care for the past 5 years

#### 50. ANTICOAG - Anticoagulants?

---

0 = No  
1 = Waran (Warfarin)  
2 = Eliquis (Apixaban)  
3 = Pradaxa (Dabigatran)  
4 = Xarelto (Rivaroxaban)  
5 = Lixiana (Edoxaban)  
6 = LMWH (Low molecular weight heparin)  
99 = Data missing

If the journal takes up the point "current medication" without mentioning the above preparation is stated 0. Alternatively, 0 is chosen even when "current medication" is not commented on and where the patient does not, according to the medical record, meet the known indication for anticoagulation, eg young and healthy patients. In other cases where no preparation is reported, state 99.

#### 51. TRCINHIB - Platelet inhibitor?

---

0 = No  
1 = Thromblyl (ASA)  
2 = Plavix (Clopidogrel)  
3 = Brilique (Ticagrelor)  
4 = Efient (Prasugrel)  
5 = Persantin (Dipyramidol)  
6 = PLETAL (Cilostazol)  
99 = No data

#### 52. DBLTRCINHIB - Dual Platelet Inhibition?

---

See list 13.

#### 53. CFS\_GRADE - Clinical frailty scale-degree?

---

0 = <50 years  
Otherwise graduation 1-9 according to the scale below.

1. **Very vital** - individuals who are strong, active, energetic, and motivated. They often exercise regularly. They belong to those who are in the best condition for their age.
2. **Vital** - individuals who have no disease symptoms but who are in worse shape than individuals in category 1. They often train or are occasionally very active, e.g. depending on the season.

3. **Doing well** - individuals whose medical problems are well controlled, but who are not regularly active in addition to regular walks.
4. **Vulnerable** - does not depend on the help of others in everyday life, but often has symptoms that limit their activities. A common complaint is that they are limited ("slowed down") and/or get tired during the day.
5. **Mild frailty** - these individuals are often noticeably slower and need help with complex IADL (Instrumental Activities of Daily Living) activities (finances, transportation, heavy housework, medication). Mild fragility generally impairs the ability to shop and go out on your own, cook, and do housework.
6. **Moderately frail** - individuals who need help with all outdoor activities and housework. Indoors, often have problems with stairs, need help with washing, and may need minimal help (encouragement, support) to get dressed.
7. **Severely frail** - is completely dependent on others for personal self-care regardless of cause (physical or cognitive). Nevertheless, they appear to be stable and without a high risk of dying (within about 6 months).
8. **Very seriously frail** - completely addicted, nearing the end of life. They can generally not recover even from a mild illness.
9. **Terminally ill** - nearing the end of life. This category includes individuals with an expected remaining life expectancy of less than 6 months with no other obvious signs of fragility.

**54.DEATH\_30D - Death within 30 days from primary visit noted in patient record?**

---

- 0 = No  
1 = Yes

**55.DEATH\_ADM - Death during the current care session?**

---

- 0 = No  
1 = Yes

**56.DEATH\_24H - Died within 24 hours of primary visit?**

---

- 0 = No  
1 = Yes

**57.DEATH\_ICI - Death secondary to traumatic intracranial injury?**

---

- 0 = No  
1 = Yes  
88 = Not relevant

**58.DEATH\_ICI\_DoI - Directly or indirectly caused by traumatic intracranial injury?**

---

- 1 = Direct  
2 = Indirect  
88 = Not relevant

**59. DEATH\_DATE - Date of death**

---

- YYYY-MM-DD  
88 = Not relevant

**60.NEURO\_INT\_30D - Neurosurgical operation or procedure within 30 days of primary visit?**

---

0 = No  
1 = Yes

**61.NEURO\_INT\_ADM - Neurosurgical intervention during the current care session?**

---

0 = No  
1 = Yes

**62.NEURO\_INT\_24H - Neurosurgical intervention within 24 hours?**

---

0 = No  
1 = Yes  
88 = Not relevant

**63.NEURO\_INT\_TYPE - Which intervention (s)?**

---

1 = Craniotomy  
2 = Burrhole  
3 = Intracranial pressure measurement  
4 = Mannitol  
5 = Hyperventilation  
6 = Hypertonic saline  
7 = Intravenous antibiotics due to skull base fracture  
8 = Other  
9 = Multiple interventions  
88 = Not relevant

**64.NEURO\_INT\_DATE - Date of the first intervention**

---

YYYY-MM-DD  
88 = Not applicable

**65.SEIZURE\_30D - Documented seizures within 30 days of primary visit?**

---

0 = No  
1 = Yes

**66.SEIZURE\_ADM - Cramps during the current care session?**

---

0 = No  
1 = Yes

**67.SEIZURE\_24H - Cramps within 24 hours of arrival?**

---

0 = No  
1 = Yes  
88 = Not relevant

**68.SEIZURE\_DATE - Date of first seizure**

---

YYYY-MM-DD  
88 = Not relevant

**69.DEC\_CONC\_30D - Decreased consciousness within 30 days of primary visit?**

---

0 = No  
1 = Yes

Defined as a decrease of 1 point in RLS or 2 points in GCS.

**70.DEC\_CONC\_ADM - Decreased consciousness during the current care session?**

---

0 = No  
1 = Yes

**71.DEC\_CONC\_24H - Decreased consciousness within 24 hours?**

---

0 = No  
1 = Yes  
88 = Not relevant

**72.DEC\_CONC\_DATE - Date of the first episode of decreased consciousness**

---

YYYY-MM-DD  
88 = Not relevant

**73.ICU\_30D - Care in the intensive care unit within 30 days from the primary visit?**

---

0 = No  
1 = Yes

**74.ICU\_ADM - Care in the intensive care unit during the current care session?**

---

0 = No  
1 = Yes

**75.ICU\_24H - Care in the intensive care unit within 24 hours from the primary visit?**

---

0 = No  
1 = Yes  
88 = Not relevant

**76. ICU\_ICI - Care in the intensive care unit due to intracranial injury?**

---

0 = No  
1 = Yes  
2 = Multiple care episodes due to ICI  
3 = Multiple care episodes due to ICI + other cause  
4 = Multiple care episodes due to other cause  
88 = Not relevant

**77.ICU\_DATE - Date of enrollment in the intensive care unit**

---

YYYY-MM-DD  
88 = Not relevant

**78.INTUB\_30D - Acutely intubated within 30 days from the primary visit due to intracranial injury?**

---

0 = No  
1 = Yes

**79.INTUB\_ADM - Acutely intubated during the current care session?**

---

0 = No  
1 = Yes

**80.INTUB\_24H - Acute intubated within 24 hours from primary visit due to intracranial injury?**

---

0 = No  
1 = Yes  
88 = Not relevant

**81.INTUB\_DATE - Date of acute intubation**

---

YYYY-MM-DD  
88 = Not applicable

**82.READMIT\_30D - Involuntary re-admission to the hospital within 30 days of primary visit linked to the current injury?**

---

0 = No  
1 = Yes

**83.READMIT\_DATE - Date for re-admission**

---

YYYY-MM-DD  
88 = Not applicable

**84.DISC\_REH\_TBI - Discharged to rehab facility due to TBI?**

---

0 = No  
1 = Yes

**85.BP\_SYST - First noted systolic blood pressure**

---

mmHg  
0 = No value during the first day

**86.BP\_DIAST - First noted diastolic blood pressure**

---

mmHg  
0 = No value first day

**87.PULSE - First recorded heart rate**

---

Stroke / minute  
0 = No value first day

**88.O2\_SAT - First noted oxygen saturation**

---

percentage  
0 = No value first day

**89.RESP\_FRQ - First noted respiratory rate**

---

breaths per minute  
0 = No value first day

**90.HB - First noted Hb values in the ED**

---

g / L

0 = Not sampled

**91. TRC - First noted platelet count in the ED**

---

10<sup>9</sup>/L

0 = Not sampled

**92. GLU - First noted blood sugar value at the emergency department**

---

mmol / L

0 = Not sampled

**93. PK\_INR - First noted PK (INR) value at the emergency department**

---

Number

0 = Not sampled

**94. APT\_T - First noted APT time in the emergency room**

---

Seconds

0 = Not sampled

**95. CT\_INJ\_1 - Injury on CT # 1**

---

1 = Subdural hemorrhage, acute

2 = Subdural haemorrhage, subacute / chronic

3 = Epidural hemorrhage

4 = Subarachnoidal hemorrhage

5 = Parenchymal hemorrhage

6 = Contusion hemorrhage

7 = Other intracranial hemorrhage

8 = Signs of DAI injuries

9 = Signs of cerebral edema

10 = Skull base fracture

11 = Crush fracture without impression

12 = Crush fracture with an impression

13 = Linear fracture without impression

14 = Linear fracture with an impression

15 = Other skull fracture

16 = Hemorrhage difficult to characterize

**96. CT\_INJ\_2 - Injury to CT # 2**

---

See list 95.

**97. CT\_INJ\_3 - Injury to CT # 3**

---

See list 95.

**98. CT\_INJ\_4 - Injury to CT # 4**

---

See 95

**99. CT\_INJ\_5 - Injury to CT # 5**

---

See 95

**100. n\_CT\_INJ - Number of isolated injuries on CT examination?**

---

Number

**101. OLD\_CT\_INJ - Older bleeding on CT?**

---

0 = No

1 = Yes

**102. MID\_SHIFT\_WRITTEN - Centerline Offset / Mass Power?**

---

0 = No

1 = Yes

2 = Not mentioned

**103. MID\_SHIFT\_MM - If yes, number of millimeters?**

---

mm

88 = Not relevant

99 = Dimensions not specified in journal

**104. LARGEST\_BLEED\_WRITTEN - Written comment on the size of the largest intracranial hemorrhage?**

---

0 = No

1 = Yes

**105. LARGEST\_BLEED\_MM - If yes, number of millimeters?**

---

mm

0 = If occurrence but size not specified

88 = Not relevant

**106. <5MM\_WRITTEN - Written report raises suspicion of bleeding less than 5 mm?**

---

0 = No

1 = Yes

**107. ATROPHY - Comment regarding the presence of cerebral atrophy in statement?**

---

0 = No

1 = Yes

**108. REP\_CT - At least 1 repeated CT Brain during the current care session?**

---

0 = No

1 = Yes

**109. REP\_CT\_WHY - Cause of Repeated CT?**

---

1 = Decreased consciousness

2 = Increasing headache

3 = New neurological abnormality

4 = Vomiting

5 = Other

6 = Reason not clear

7 = Supplementary examination

88 = Not applicable

**110. REP\_CT\_WORSE - Deterioration on CT?**

---

- 0 = No change
- 1 = Deterioration of existing damage
- 2 = New damage
- 3 = New damage + deterioration of existing damage
- 88 = Not applicable

**111. AIS\_FACE - Maximum AIS value on the face.**

---

0-6

Wound injuries, hematomas, and abrasions are excluded from this grading and are assessed as 0. If multiple injuries within the same region, the one with the highest value is selected.

**112. AIS\_NECK - Maximum AIS value on the neck**

---

See 111.

**113. AIS\_THX - Maximum AIS value from the chest**

---

See 111

**114. AIS\_ABD - Maximum AIS value from the abdomen**

---

See 111.

**115. AIS\_SPINE - Maximum AIS values from the spine**

---

See 111.

**116. AIS\_W- SPINE - Maximum AIS value from the entire spine as a unit**

---

See 111.

**117. AIS\_C-SPINE - Maximum AIS value from the cervical spine**

---

See 111.

**118. AIS\_T-SPINE - Maximum AIS value from the thoracic spine**

---

See 111.

**119. AIS\_L-SPINE - Maximum AIS value from the lumbar spine**

---

See 111.

**120. AIS\_U-EXT - Maximum AIS value from the upper extremities**

---

See 111.

**121. AIS\_L-EXT - Maximum AIS value from the lower extremities**

---

See 111.
