# Supplementary material for: Comparison of the predictive value of two international guidelines for safe discharge of patients with mild traumatic brain injuries and associated intracranial pathology
Source: Springer Nature journal article supplement (doi:10.1007/s00068-021-01842-6), 2021-12-03
Supplement: MOESM2 [file 19930264]

## **Supplementary material 1: Included ICD-10 codes**

### **Title:**

Performance of the Brain Injury Guidelines and the Mild Traumatic Brain Injury Risk Score in a Scandinavian population – A Retrospective Chart Review

### **Journal:**

European Journal of Trauma and Emergency Surgery

### **Authors:**

Sebastian Vestlund (**Corresponding author**)  
Faculty of Medicine – Department of Clinical Sciences,  
Lund University, Sweden  
[Sebastian.Vestlund@med.lu.se](mailto:Sebastian.Vestlund@med.lu.se)  
+46708244127

Sebastian Tryggmo  
Faculty of Medicine,  
Lund University, Sweden

Tomas Vedin  
Faculty of Medicine – Department of Clinical Sciences  
Lund University, Sweden

Per-Anders Larsson  
Faculty of Medicine – Department of Clinical Sciences  
Lund University, Sweden

Marcus Edelhamre  
Faculty of Medicine – Department of Clinical Sciences  
Lund University, Sweden

**Included ICD-10 codes**

**S02.0** – Fracture of Vault of Skull

**S02.1** – Fracture of Base of Skull

**S02.7** – Multiple Fractures Involving Skull and Facial Bones

**S02.8** – Fractures of Other Skull and Facial Bones

**S02.9** – Fracture of Skull and Facial Bones, Part Unspecified

**S06.1** – Traumatic Cerebral Edema

**S06.2** – Diffuse Traumatic Brain Injury

**S06.3** – Focal Traumatic Brain Injury

**S06.4** – Epidural Hematoma

**S06.5** – Traumatic Subdural Hematoma

**S06.6** – Traumatic Subarachnoid Hemorrhage

**S06.7** – Intracranial Injury with Prolonged Coma

**S06.8** – Other Specified Intracranial Injuries

**S06.9** – Unspecified Intracranial Injury
